# Supplementary material
Source: publisher figshare collection journal article supplement (https://gsajournals.figshare.com/articles/dataset/_/13180655)
Supplement: Supplementary file 1 [file 1]

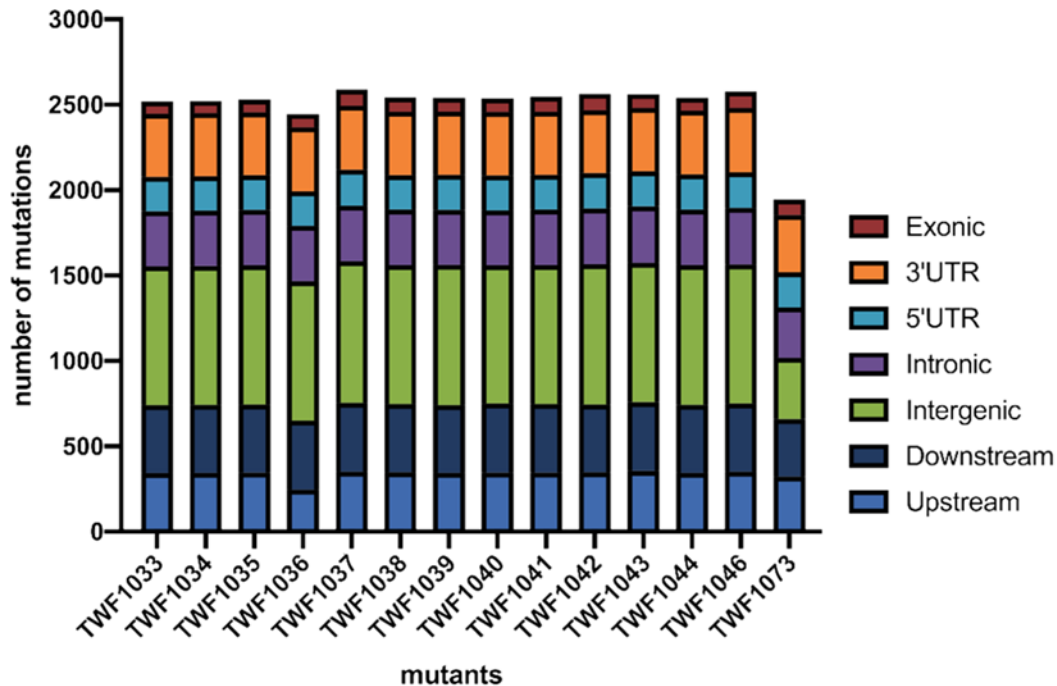

**Supplementary Fig. 2** Total mutations annotated for each mutant. Different types of mutation are individually colored.
