# Supplementary material
Source: publisher figshare collection journal article supplement (https://gsajournals.figshare.com/articles/dataset/_/13180655)

WT

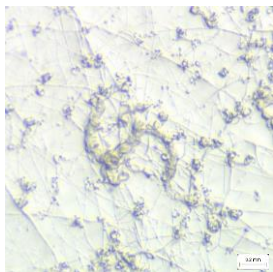

TWF1033

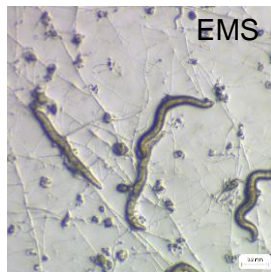

TWF1034

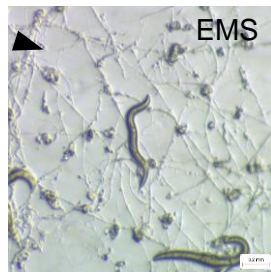

TWF1044

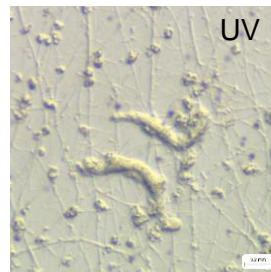

TWF1038

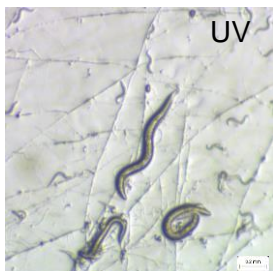

TWF1039

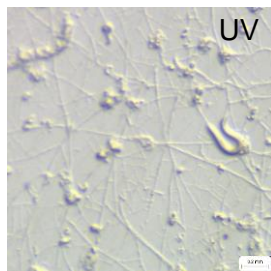

TWF1035

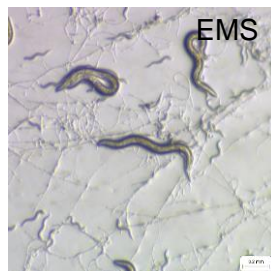

TWF1040

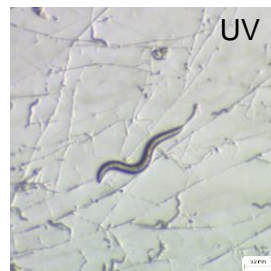

TWF1041

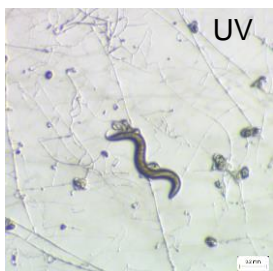

TWF1043

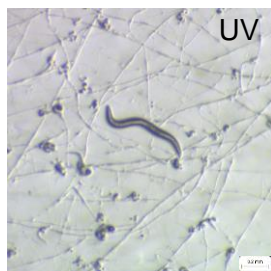

TWF1073

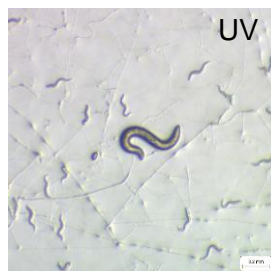

TWF1037

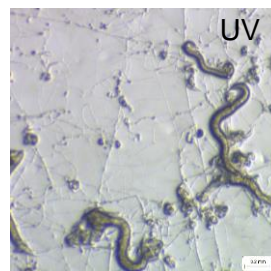

TWF1036

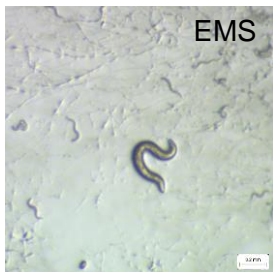

TWF1042

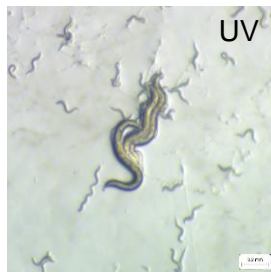

TWF1045

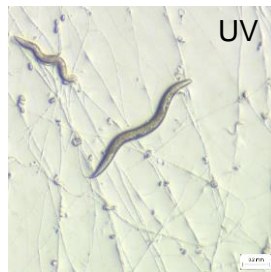

TWF1046

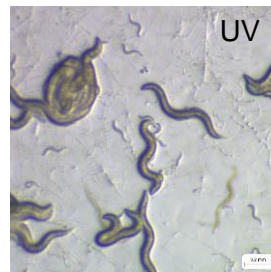

Supplement: Supplementary file 2 [file 1]
